# Supplementary material for: Bis(4-pyridyl)mercury – a new linear tecton in crystal engineering: coordination polymers and co-crystallization processes
Source: Royal Society of Chemistry journal article supplement (doi:10.1039/c5ce00388a), 2015-01-01
Supplement: c5ce00388a1.pdf [file c5ce00388a1.pdf]

## ELECTRONIC SUPPLEMENTARY INFORMATION

### **Bis(4-pyridyl)mercury – a new linear tecton in crystal engineering: coordination polymers and co-crystallization processes**

Teodora Mocanu, Ciprian I. Raț, Catalin Maxim, Sergiu Shova, Violeta Tudor,  
Cristian Silvestru, Marius Andruh

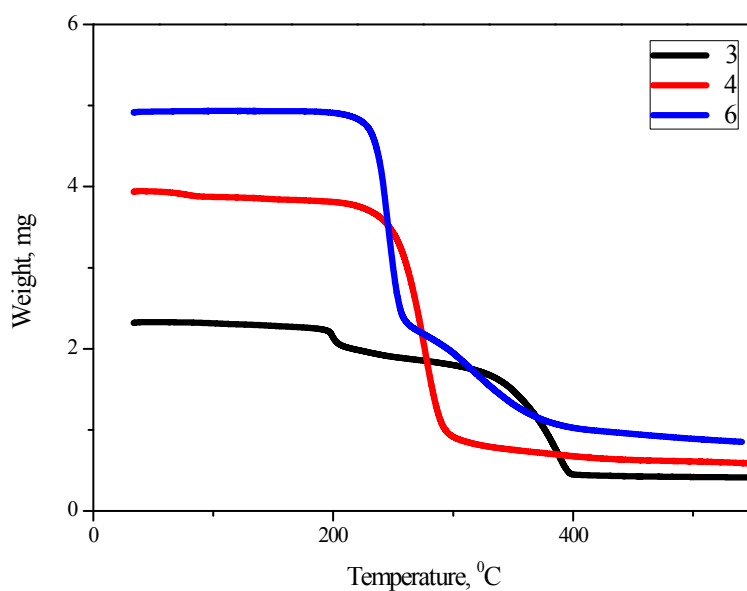

**Figure S1.** TG curves for compounds **3**, **4**, and **6**.
